# Supplementary material for: Effects of Maternal Homelessness, Supplemental Nutrition Programs, and Prenatal PM2.5 on Birthweight
Source: MDPI journal article supplement (doi:10.3390/ijerph16214154), 2019-10-28

## Supplementary materials

**Table S1. Change in birthweight (g) for a 1  $\mu\text{g}/\text{m}^3$  increase in the average  $\text{PM}_{2.5}$  during 1st, 2nd and 3rd pregnancy trimester, and for prenatal homelessness and the Special Supplemental Nutrition Program for Women, Infants and Children (WIC) participation status in Boston-based Children's HealthWatch cohort (N = 3366).**

| Variables                                                         | Change in birthweight (g)<br>(95% CI) |
|-------------------------------------------------------------------|---------------------------------------|
| Average $\text{PM}_{2.5}$ during 1st trimester                    | 4.8 (-7.2, 16.9)                      |
| Average $\text{PM}_{2.5}$ during 2nd trimester                    | -8.5 (-19.3, 2.3)                     |
| Average $\text{PM}_{2.5}$ during 3rd trimester                    | -0.6 (-13.3, 12.2)                    |
| Ever homeless or live in shelter during pregnancy with this child | -55.7 (-97.8, -13.7)                  |
| Prenatal WIC participation with this child                        | 36.1 (-7.3, 79.4)                     |

Note: adjusted for maternal age, body mass index (BMI), race/ethnicity, nativity, education, smoking history, insurance, marital status, child gestational age and sex, seasonality, and median household income.

**Table S2. Change in birthweight (g) for a 1  $\mu\text{g}/\text{m}^3$  increase in the average  $\text{PM}_{2.5}$  during 2nd trimester across maternal and child characteristics in Boston-based Children’s HealthWatch cohort (N = 3366).**

| <b>Groups</b>                         | <b>Change in birthweight (g) (95% CI)</b> |
|---------------------------------------|-------------------------------------------|
| Maternal nativity                     |                                           |
| US born                               | -5.1 (-18.5, 8.2)                         |
| Immigrant                             | -14.4 (-31.7, 2.9)                        |
| Maternal Race/Ethnicity               |                                           |
| White, non-Hispanic                   | 14.0 (-20.1, 48.1)                        |
| Hispanic                              | -8.8 (-27.5, 10.0)                        |
| Black, non-Hispanic                   | -15.2 (-29.4, -0.9)                       |
| Other                                 | 23.1 (-42.5, 88.6)                        |
| Maternal Education                    |                                           |
| Some high school or less              | -15.4 (-39.0, 8.2)                        |
| High school                           | -11.6 (-30.1, 6.9)                        |
| Tech School/College Graduate/Master’s | -3.8 (-18.9, 11.2)                        |
| Maternal Smoking                      |                                           |
| Ever Smoked in the past 5 years       | 15.9 (-4.3, 36.2)                         |
| No smoking                            | -17.3 (-29.7, -4.8)                       |
| Marital status                        |                                           |
| Single                                | -13.8 (-28.0, 0.4)                        |
| Married/Partnered/Cohabiting          | -4.3 (-22.4, 13.8)                        |
| Separated/Divorced                    | 5.1 (-26.2, 36.5)                         |
| Child sex                             |                                           |
| Male                                  | -12.5 (-27.0, 2.0)                        |
| Female                                | -4.0 (-19.4, 11.3)                        |
| Prenatal Homelessness                 |                                           |
| No                                    | -8.1 (-19.7, 3.5)                         |
| Yes                                   | -10.8 (-37.4, 15.9)                       |
| WIC Participation                     |                                           |
| No                                    | -18.3 (-45.6, 9.1)                        |
| Yes                                   | -6.9 (-18.5, 4.7)                         |

Figure S1. Concentration-response function of the exposure to average PM<sub>2.5</sub> during 2nd trimester ( $\mu\text{g}/\text{m}^3$ ) on change in birthweight (g) in Boston-based Children's HealthWatch cohort (N = 3366).

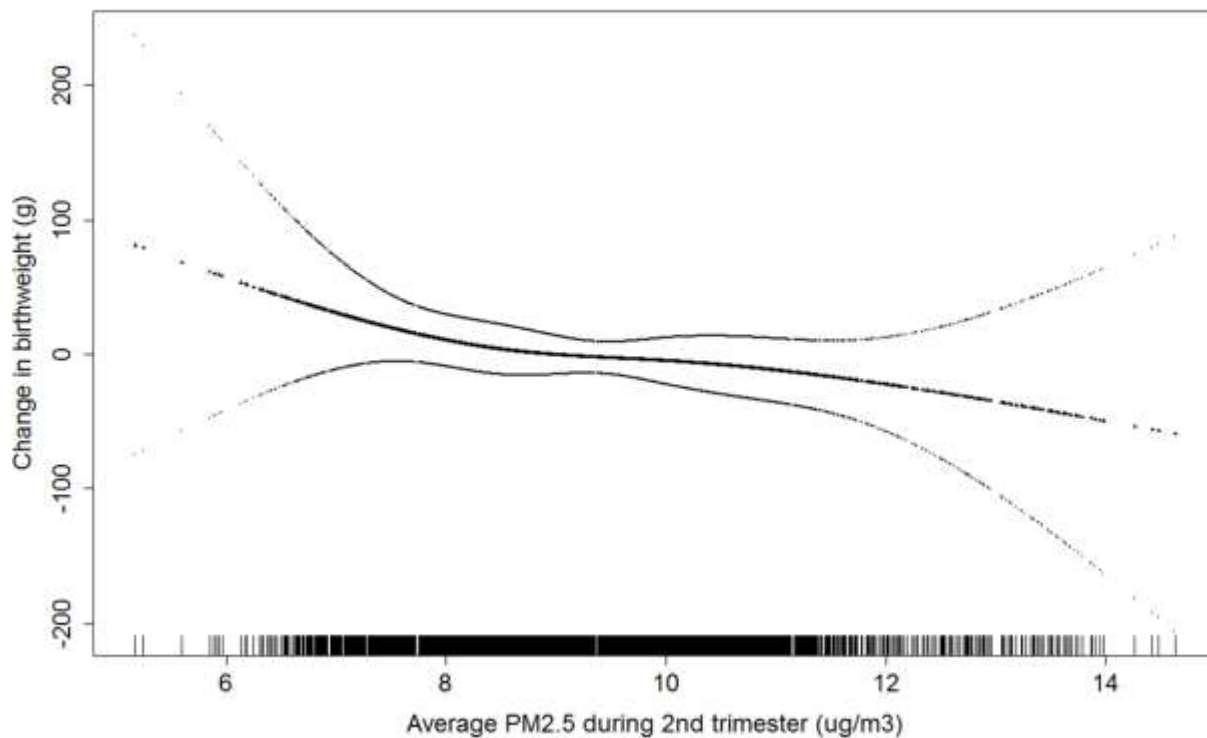

Figure S2. Concentration-response function of the exposure to average PM<sub>2.5</sub> during 1st trimester ( $\mu\text{g}/\text{m}^3$ ) on change in birthweight (g) in Boston-based Children's HealthWatch cohort (N = 3366).

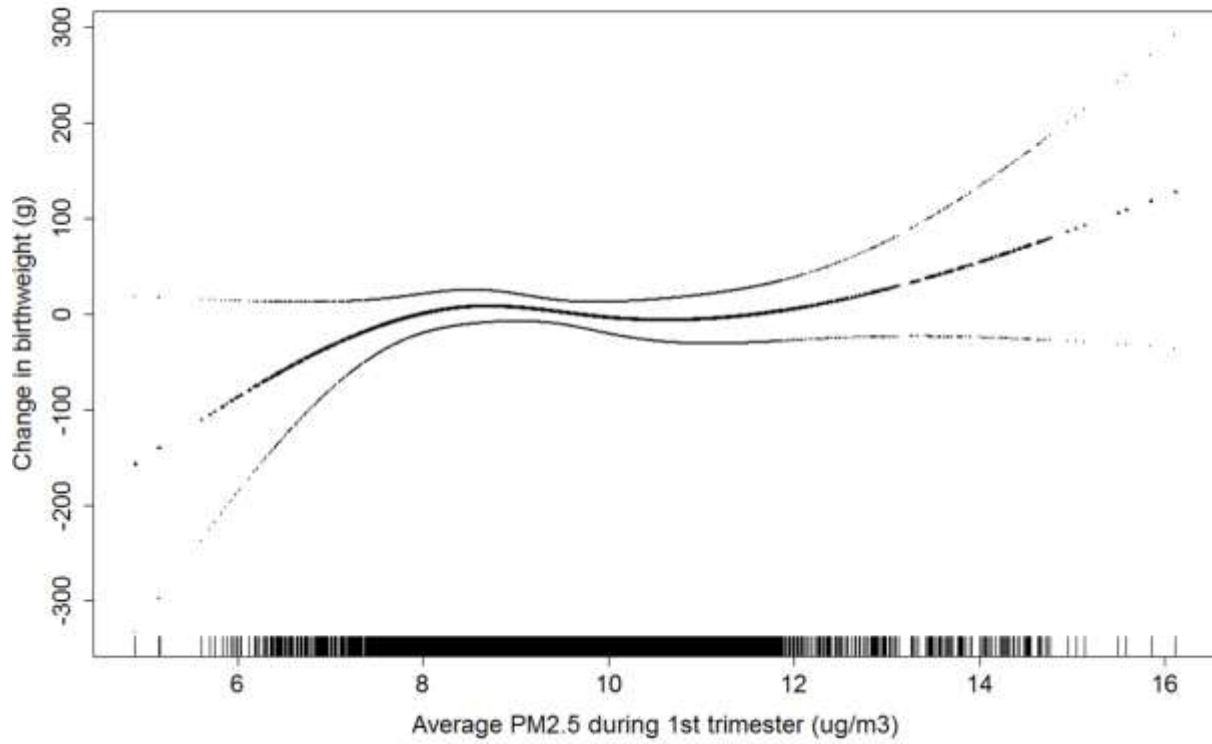

Figure S3. Concentration-response function of the exposure to average PM<sub>2.5</sub> during 3rd trimester ( $\mu\text{g}/\text{m}^3$ ) on change in birthweight (g) in Boston-based Children's HealthWatch cohort (N = 3366)

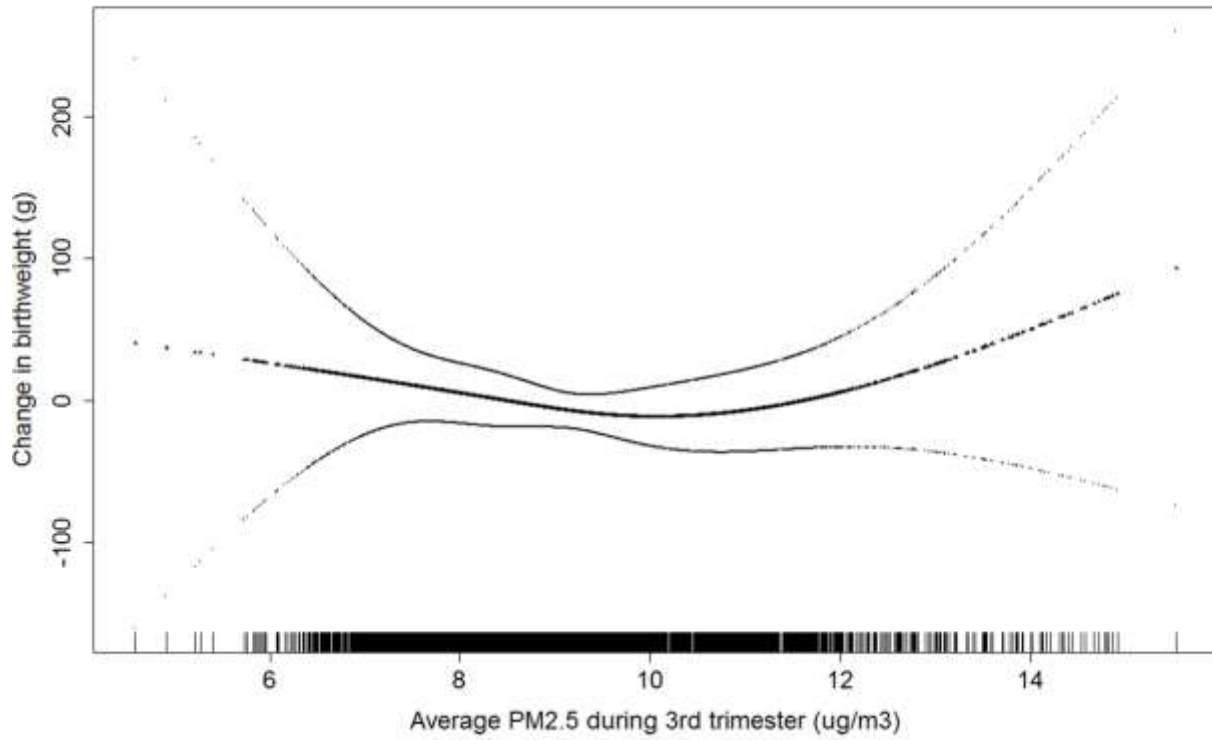

Supplement: s1 [file s1]
